# Supplementary material for: Promotional role of NiCu alloy in catalytic performance and carbon properties for CO2-free H2 production from thermocatalytic decomposition of methane
Source: Royal Society of Chemistry journal article supplement (doi:10.1039/d2cy01782b), 2023-01-01
Supplement: d2cy01782b1.pdf [file d2cy01782b1.pdf]

# Supporting Information

## Promotional role of NiCu alloy in catalytic performance and carbon properties for CO<sub>2</sub>-free H<sub>2</sub> production from thermocatalytic decomposition of methane

Mengze Xu <sup>a,1</sup>, Juan Lopez-Ruiz <sup>a,1</sup>, Nickolas W. Riedel <sup>a,1</sup>, Robert S. Weber <sup>a,1</sup>, Mark E. Bowden <sup>b</sup>, Libor Kovarik <sup>b</sup>, Changle Jiang <sup>c</sup>, Jianli Hu <sup>c</sup>, and Robert A. Dagle <sup>a\*</sup>

<sup>a</sup> *Institute for Integrated Catalysis, Pacific Northwest National Laboratory, Richland, WA 99354, USA*

<sup>b</sup> *Environmental Molecular Sciences Laboratory, Pacific Northwest National Laboratory, Richland, WA 99354, USA*

<sup>c</sup> *Department of Chemical & Biomedical Engineering, West Virginia University, Morgantown, WV 26506, USA*

\*Correspondence to: [Robert.Dagle@pnnl.gov](mailto:Robert.Dagle@pnnl.gov)

Number of pages: 10

Number of Tables: 4

Number of Figures: 9

**Table S1.** Physiochemical properties of different support CNTs and solvothermal catalysts (which used raw CNTs as support). Fresh catalysts were reduced at 400 °C for 4 h.

| Catalysts<br>Fresh reduced<br>(Solvothermal) | Metal loading (wt%) <sup>a</sup> |       | BET surface<br>area (m <sup>2</sup> ·g <sup>-1</sup> ) |
|----------------------------------------------|----------------------------------|-------|--------------------------------------------------------|
|                                              | Ni                               | Cu    |                                                        |
| Raw CNT                                      | -                                | -     | 161                                                    |
| HCNT                                         | -                                | -     | 187                                                    |
| Ni/CNT                                       | 8.80                             | -     | 133                                                    |
| NiCu0.6/CNT                                  | 8.91                             | 0.45  | 140                                                    |
| NiCu1/CNT                                    | 8.96                             | 0.86  | 147                                                    |
| NiCu2/CNT                                    | 10.42                            | 1.87  | 142                                                    |
| NiCu5/CNT                                    | 8.99                             | 5.25  | 137                                                    |
| NiCu10/CNT                                   | 9.66                             | 8.74  | 128                                                    |
| NiCu15/CNT                                   | 10.38                            | 13.89 | 154                                                    |

<sup>a</sup> Results derived from ICP

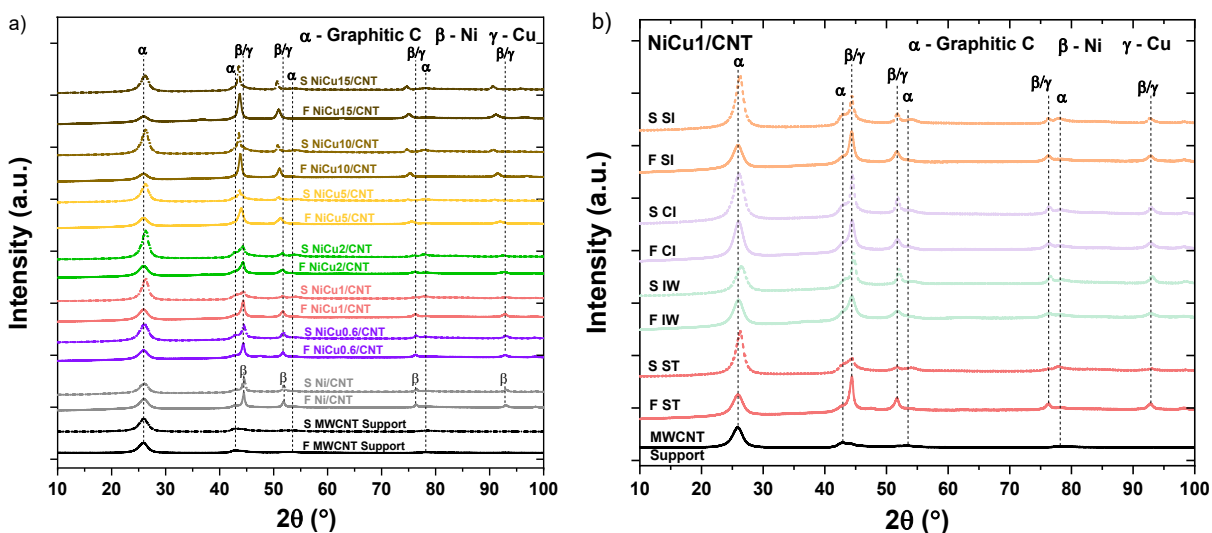

**Figure S1.** XRD patterns of fresh (F) reduced and spent (S) of a) solvothermal NiCu<sub>x</sub>/CNT catalyst and b) NiCu<sub>x</sub>/CNT catalyst prepared by different synthesis method such as incipient wetness (IW), co-impregnation (CI), and sequential impregnation (SI). The fresh catalysts were reduced at 400 °C for 4 h in 5 vol% H<sub>2</sub> in N<sub>2</sub>. The spent catalysts were retrieved after reaction at 600 °C under 30 cm<sup>3</sup>/min 30 vol% CH<sub>4</sub> in N<sub>2</sub>.

**Table S2.** Crystallite sizes and metal phases of solvothermal catalysts NiCu<sub>x</sub>/CNT ( $x = 0, 0.6, 1, 2, 5, 10, \text{ and } 15$ ) based on XRD analysis. Fresh catalysts were reduced at 400 °C for 4 h. Spent catalysts were retrieved after reaction at 600 °C under 30 cm<sup>3</sup>/min 30 vol% CH<sub>4</sub>/N<sub>2</sub>.

| Catalysts | Fresh           |                          |                       |               |                 |                       | Spent, reaction at 600 °C |                 |                       |               |                 |                       | Change, %        |             |
|-----------|-----------------|--------------------------|-----------------------|---------------|-----------------|-----------------------|---------------------------|-----------------|-----------------------|---------------|-----------------|-----------------------|------------------|-------------|
|           | ICP             | Metal oxide <sup>a</sup> |                       | Ni-rich alloy |                 |                       | Ni-rich alloy             |                 |                       | Cu-rich alloy |                 |                       | Crystallite Size | Ni/Cu Ratio |
|           | Ni/Cu (mol/mol) | wt.% (%)                 | Crystallite size (nm) | wt.% (%)      | Ni/Cu (mol/mol) | Crystallite size (nm) | wt.% (%)                  | Ni/Cu (mol/mol) | Crystallite size (nm) | wt.% (%)      | Ni/Cu (mol/mol) | Crystallite size (nm) |                  |             |
| Ni        | -               | 0                        | -                     | 100           | -               | 11.8                  | 100                       | -               | 16.9                  | -             | -               | -                     | 43.2             | -           |
| NiCu0.6   | 21.4            | 0                        | -                     | 100           | 52.7            | 13.1                  | 100                       | 44.6            | 17.8                  | -             | -               | -                     | 35.9             | -15.4       |
| NiCu1     | 11.3            | 0                        | -                     | 100           | 24.3            | 11.0                  | 100                       | 17.6            | 9.4                   | -             | -               | -                     | -14.6            | -27.6       |
| NiCu2     | 6.03            | 18                       | 4.6                   | 88            | 9.99            | 10.5                  | 90                        | 6.66            | 12.5                  | 10            | 0.9             | 25.0                  | 19.0             | -33.3       |
| NiCu5     | 1.85            | 0                        | -                     | 100           | 2.11            | 7.30                  | 32                        | 5.00            | 10.6                  | 68            | 0.4             | 22.0                  | 45.2             | 137         |
| NiCu10    | 1.20            | 12                       | 6.5                   | 84            | 1.17            | 11.9                  | 100                       | 0.248           | 12.7                  | -             | -               | -                     | 6.7              | -78.8       |
| NiCu15    | 0.809           | 12                       | -                     | 88            | 0.790           | 8.60                  | 100                       | 0.254           | 17.2                  | -             | -               | -                     | 100              | -67.9       |

<sup>a</sup> The presence of the metal oxide (e.g., NiO, CuO, Cu<sub>2</sub>O) might be a result of the passivation step used after catalyst reduction and exposure to air.

**Table S3.** Crystallite sizes and metal phases of NiCu1 catalysts prepared by different synthesis methods based on XRD analysis. Fresh catalysts were reduced at 400 °C for 4 h. Spent catalysts were retrieved after reaction at 600 °C under 30 cm<sup>3</sup>/min 30 vol% CH<sub>4</sub> in N<sub>2</sub>.

| Catalysts       | Fresh                          |      |                              |                         |                          |                  |                            |                 |                  | Spent                      |                 |                  |
|-----------------|--------------------------------|------|------------------------------|-------------------------|--------------------------|------------------|----------------------------|-----------------|------------------|----------------------------|-----------------|------------------|
|                 | Metal loading <sup>a</sup> (%) |      | Ni/Cu <sup>a</sup> (mol/mol) | BET (m <sup>2</sup> /g) | Metal oxide <sup>b</sup> |                  | Ni-rich alloy <sup>b</sup> |                 |                  | Ni-rich alloy <sup>b</sup> |                 |                  |
|                 | Ni                             | Cu   |                              |                         | wt.%                     | Particle size/nm | wt.%                       | Ni/Cu (mol/mol) | Particle size/nm | wt. %                      | Ni/Cu (mol/mol) | Particle size/nm |
| NiCu1/CNT (ST)  | 8.96                           | 0.86 | 11.3                         | 147                     | 0                        | -                | 100                        | 24.3            | 11.0             | 100                        | 19              | 9.4              |
| NiCu1/HCNT (IW) | 13.1                           | 1.33 | 10.7                         | 214                     | 24                       | 4.3              | 76                         | 13.0            | 8.0              | 100                        | 32              | 10.6             |
| NiCu1/HCNT (CI) | 10.3                           | 0.95 | 11.8                         | 217                     | 0                        | -                | 100                        | 19.3            | 7.4              | 100                        | 49              | 9.3              |
| Cu1Ni/HCNT (SI) | 10.9                           | 1.07 | 11.1                         | 226                     | 0                        | -                | 100                        | 20.2            | 8.4              | 100                        | 19              | 15.1             |

<sup>a</sup> Results derived from ICP

<sup>b</sup> Results derived from XRD analysis

**Table S4.** Fitting parameters for deactivation at solvothermal catalysts run at different temperatures (550, 600, 650, and 700 °C) and the carbon co-product that accumulates at the indicated time on stream,  $\theta$ . The catalyst sample weighed 0.2 g so all but one of the samples (Ni/CNT (ST)) accumulated an amount of carbon that exceeded the mass of the MWCNT support (i.e., <0.18 g) at the indicated, final time on stream.

| Catalyst        | Cu mol fraction | Temperature (°C) | $X_0$ (%) | $k$ (h <sup>-0.5</sup> ) | $\theta$ (h) | Actual Carbon Yield (g <sub>C</sub> /g <sub>cat</sub> ) | Predicted Carbon Yield (g <sub>C</sub> /g <sub>cat</sub> ) |
|-----------------|-----------------|------------------|-----------|--------------------------|--------------|---------------------------------------------------------|------------------------------------------------------------|
| Ni/CNT (ST)     | 0               | 550              | 56.3      | 0.373                    | 5            | 24.3                                                    | 24.4                                                       |
|                 |                 | 600              | 135       | 3.09                     | 0.87         | 0.282                                                   | 0.251                                                      |
|                 |                 | 650              | 6094      | 22.1                     | 0.67         | 0.268                                                   | 0.228                                                      |
|                 |                 | 700              | 30.3      | 5.04                     | 1            | 0.0235                                                  | 0.0210                                                     |
| NiCu1/CNT (ST)  | 0.081           | 550              | 29.40     | 0.0787                   | 5            | 3.50                                                    | 1.71                                                       |
|                 |                 | 600              | 62.6      | 0.309                    | 5            | 2.52                                                    | 2.61                                                       |
|                 |                 | 650              | 225       | 4.50                     | 0.53         | 0.266                                                   | 0.187                                                      |
|                 |                 | 700              | n/a       | n/a                      | -            | -                                                       | -                                                          |
| NiCu15/CNT (ST) | 0.553           | 550              | 27.1      | 0.0943                   | 5            | 1.88                                                    | 1.55                                                       |
|                 |                 | 600              | 32.1      | 0.0561                   | 5            | 1.93                                                    | 1.94                                                       |
|                 |                 | 650              | 53.0      | 0.0150                   | 5            | 3.11                                                    | 3.39                                                       |
|                 |                 | 700              | 88.6      | 1.68                     | 4.3          | 1.24                                                    | 0.666                                                      |

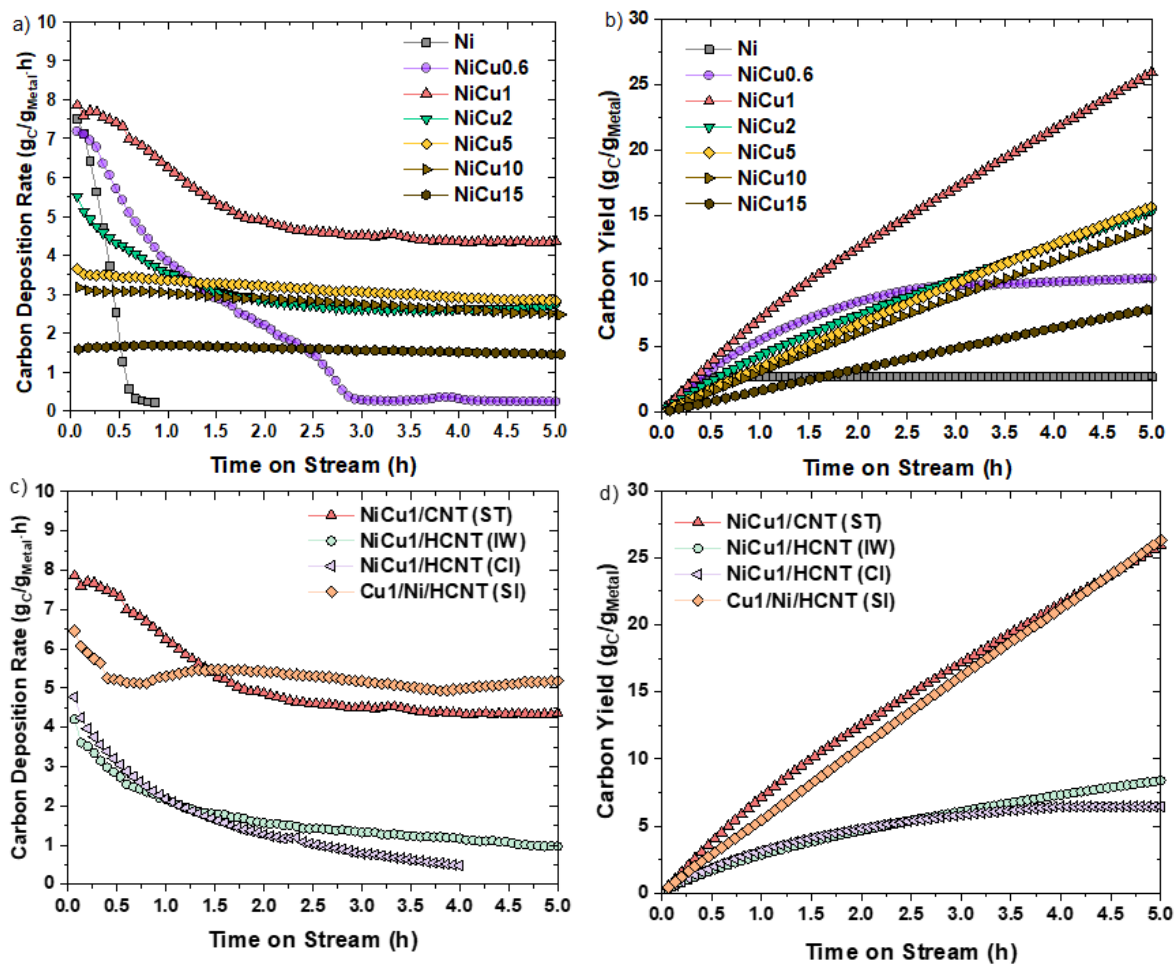

**Figure S2.** Activity of a-b) NiCu<sub>x</sub>/CNT ( $x = 0, 0.6, 1, 2, 5, 10, 15$ ) synthesized by solvothermal (ST) method and c-d) NiCu1/CNT prepared by different synthesis methods [incipient wetness (IW), co-impregnation (CI), sequential-impregnation (SI)] as a function of time on stream at reaction temperature of 600 °C under 30 cm<sup>3</sup>/min 30 vol% CH<sub>4</sub> in N<sub>2</sub>. GHSV ≈ 3000 h<sup>-1</sup>. The background activity of the raw CNT was <0.2% CH<sub>4</sub> conversion.

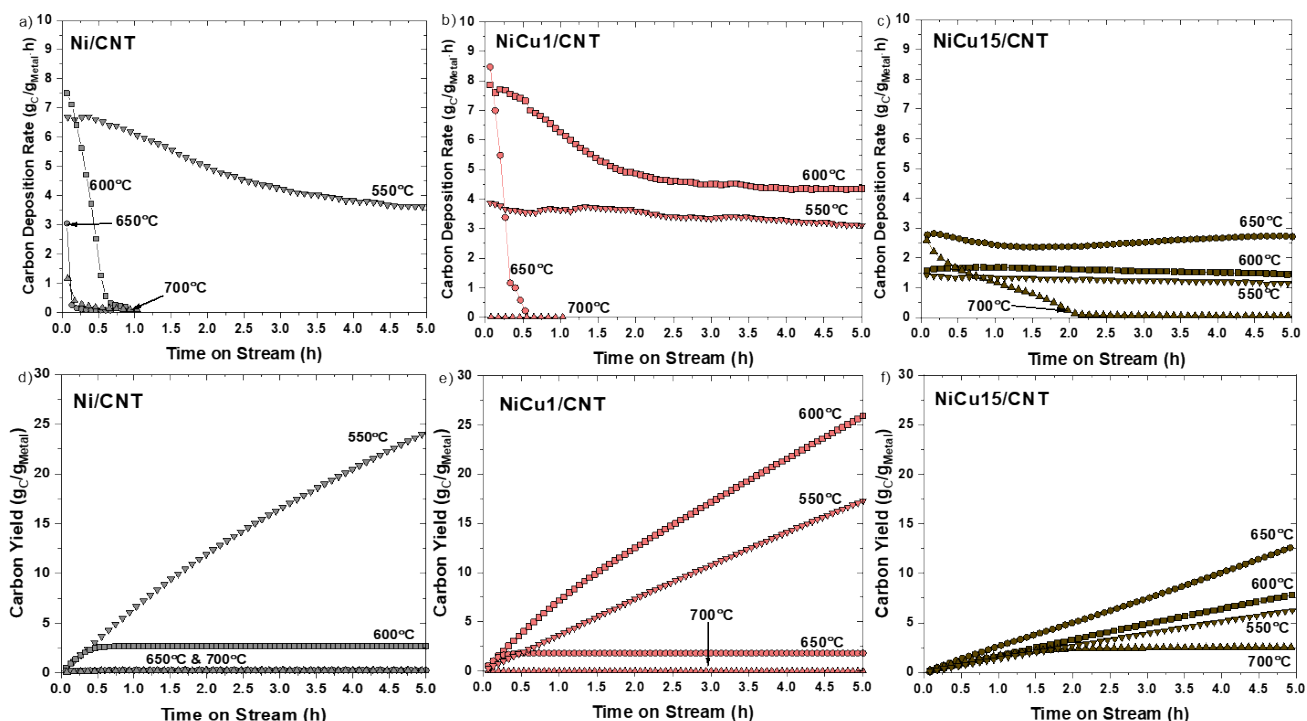

**Figure S3.** a-c) carbon deposition rate and d-e) carbon yield for Ni/CNT, NiCu1/CNT, and NiCu15/CNT at different reaction temperature (550 to 700°C) as a function of time on stream (SOT) under 30 cm<sup>3</sup>/min 30 vol.% CH<sub>4</sub> in N<sub>2</sub>.

**Table S5.** Crystallite sizes and composition of spent solvothermal Ni/CNT, NiCu1/CNT, and NiCu15/CNT catalysts based on XRD analysis. The spent catalysts were retrieved after reaction at different temperatures (550, 600, 650, and 700°C) under 30 cm<sup>3</sup>/min 30 vol.% CH<sub>4</sub> in N<sub>2</sub>.

| Spent catalysts | 550°C            |                        |                                  | 600°C         |                        |                                  | 650 °C        |                        |                                  |               |                        |                                  | 700 °C        |                        |                                  |
|-----------------|------------------|------------------------|----------------------------------|---------------|------------------------|----------------------------------|---------------|------------------------|----------------------------------|---------------|------------------------|----------------------------------|---------------|------------------------|----------------------------------|
|                 | Ni-rich alloy    |                        |                                  | Ni-rich alloy |                        |                                  | Ni-rich alloy |                        |                                  | Cu-rich alloy |                        |                                  | Ni-rich alloy |                        |                                  |
|                 | wt.%<br>(%)      | Ni/Cu<br>(mol/<br>mol) | Crysta-<br>llite<br>size<br>(nm) | wt.%<br>(%)   | Ni/Cu<br>(mol/<br>mol) | Crysta-<br>llite<br>size<br>(nm) | wt.%<br>(%)   | Ni/Cu<br>(mol/<br>mol) | Crysta-<br>llite<br>size<br>(nm) | wt.%<br>(%)   | Ni/Cu<br>(mol/<br>mol) | Crysta-<br>llite<br>size<br>(nm) | wt.%<br>(%)   | Ni/Cu<br>(mol/<br>mol) | Crysta-<br>llite<br>size<br>(nm) |
| Ni/CNCT (ST)    | 100              | -                      | 9.20                             | 100           | -                      | 16.9                             | 100           | -                      | 18.3                             | -             | -                      | -                                | 100           | -                      | 14.6                             |
| NiCu1/CNT (ST)  | BDL <sup>a</sup> | BDL <sup>a</sup>       | BDL <sup>a</sup>                 | 100           | 17.6                   | 9.40                             | 87            | ∞                      | 19.4                             | 13.           | 2.80                   | 27.0                             | 100           | 19.7                   | 14.6                             |
| NiCu15/CNT (ST) | 100              | 0.133                  | 21.4                             | 100           | 0.254                  | 17.2                             | 100           | 0.418                  | 21.5                             | -             | -                      | -                                | 100           | 0.676                  | 10.4                             |

<sup>a</sup> Below Detection Limit: The features of the metal were too dilute due to carbon formation and potential metal fragmentation and crystallite properties could not be determined.

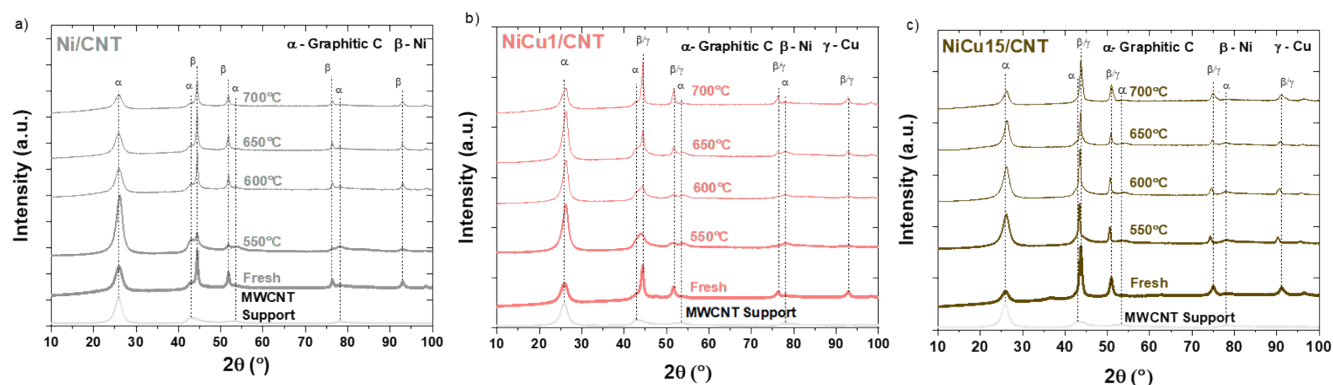

**Figure S4.** XRD patterns of a) Ni/CNT, b) NiCu1/CNT, and c) NiCu15 prepared by solvothermal synthesis at different reaction temperature under 30 cm<sup>3</sup>/min 30 vol.% CH<sub>4</sub> in N<sub>2</sub>.

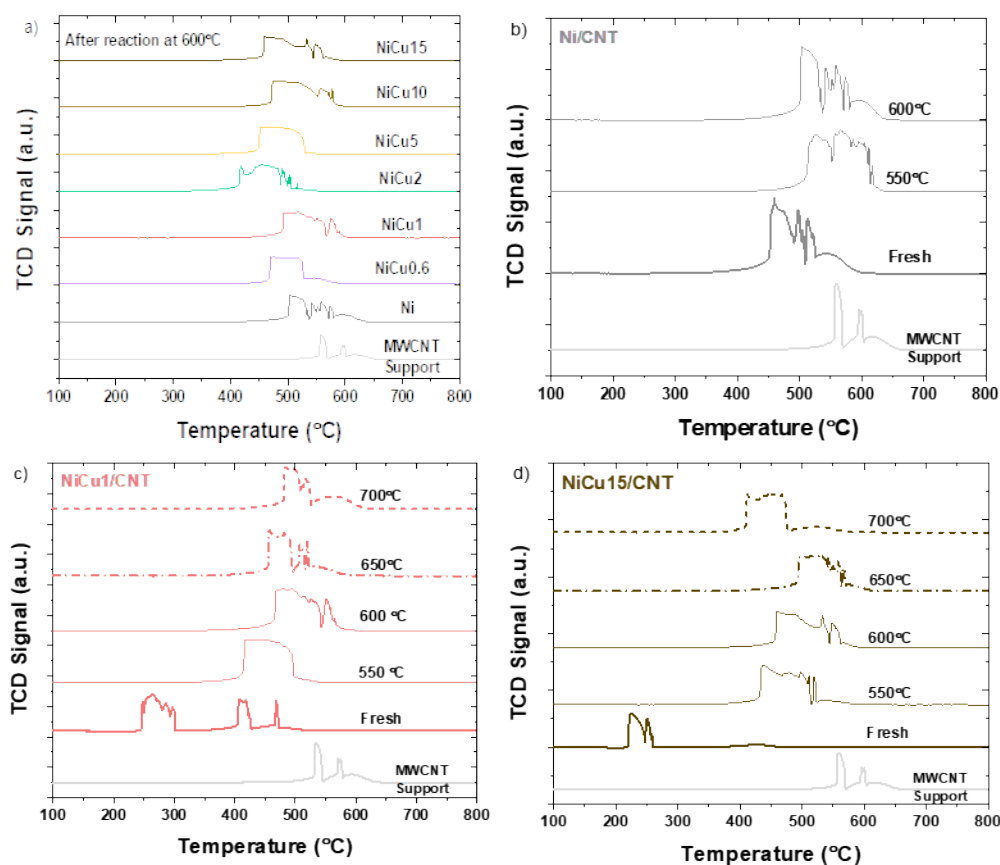

**Figure S5.** TPO plots of spent solvothermal catalysts retrieved after reaction. a) NiCu<sub>x</sub>/CNT (ST) ( $x=0, 0.6, 1, 2, 5, 10$ , and 15) at reaction of 600 °C; b) NiCu1/CNT (ST); c) NiCu15/CNT (ST) at different reaction temperatures (600 °C, 650 °C and 700 °C) respectively.

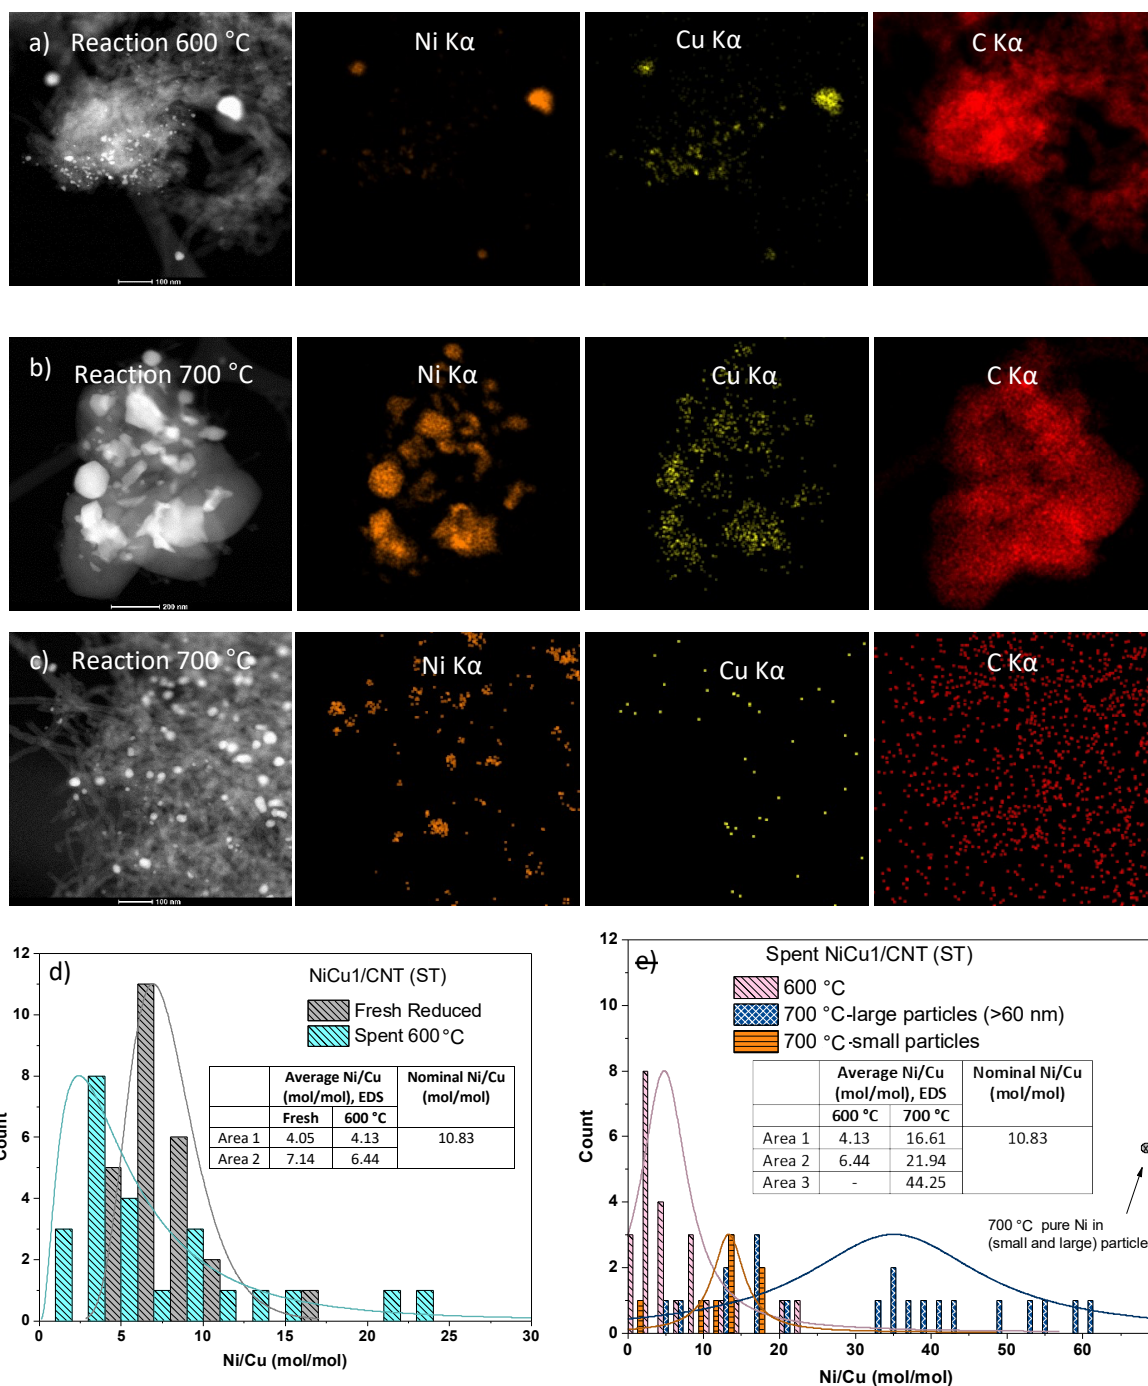

**Figure S6.** Elemental analysis of spent NiCu1/CNT (ST) after reaction at a) 600°C and b-c) 700°C under 30 cm<sup>3</sup>/min 30 vol.% CH<sub>4</sub> in N<sub>2</sub>. d) is the histogram representing the change in elemental distribution between fresh and spent at 600°C. e) is the histogram representing the change in elemental distribution between spent at 600°C and 700°C.



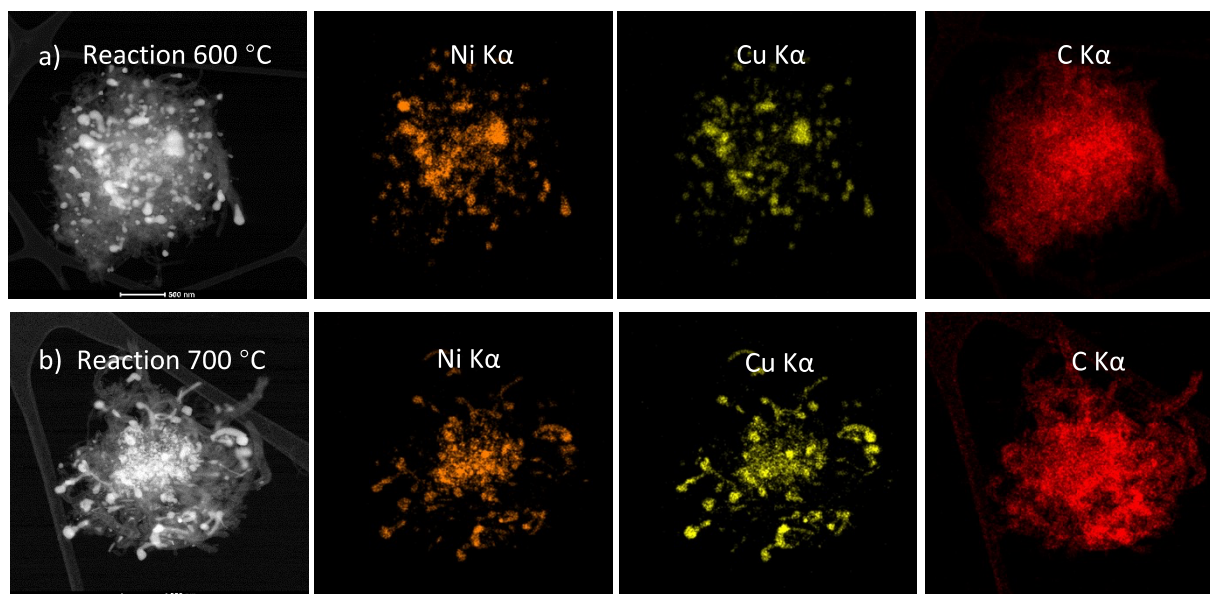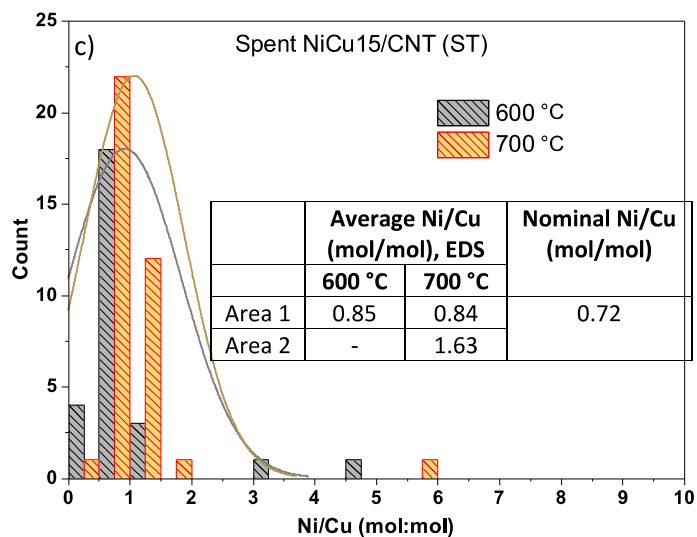

**Figure S7.** Elemental analysis of spent NiCu15/CNT (ST) after reaction at a) 600°C and b) 700°C under 30 cm<sup>3</sup>/min 30 vol.% CH<sub>4</sub> in N<sub>2</sub>. c) histogram representing the change in elemental distribution between spent at 600°C and 700°C.

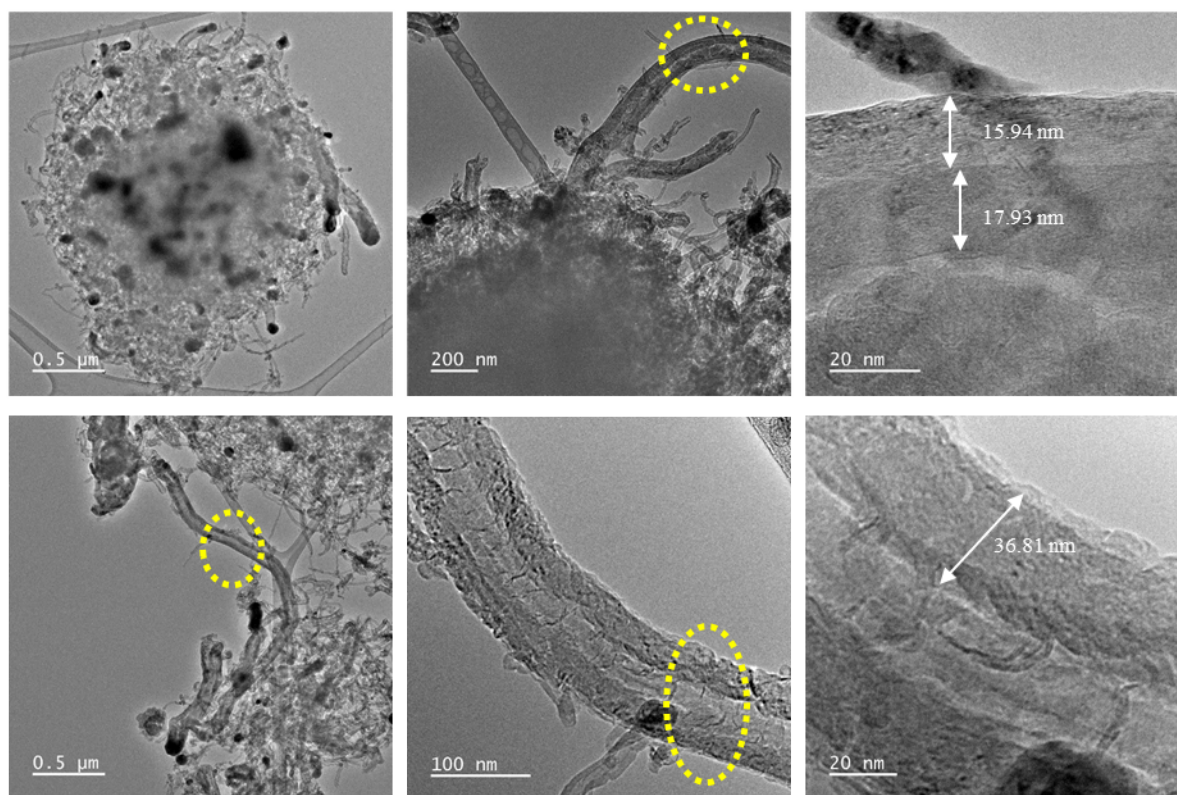

**Figure S8.** STEM images of spent NiCu15/CNT (ST) at 600°C under 30 cm<sup>3</sup>/min 30 vol.% CH<sub>4</sub> in N<sub>2</sub>.

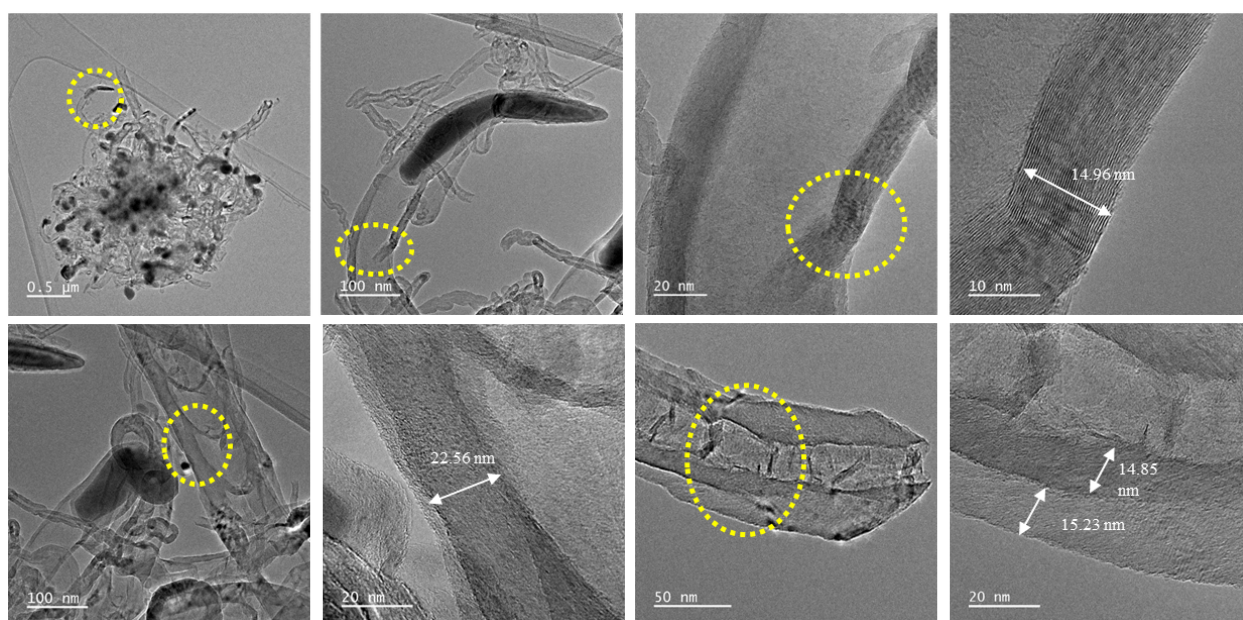

**Figure S9.** STEM images of spent NiCu15/CNT (ST) at 700°C under 30 cm<sup>3</sup>/min 30 vol.% CH<sub>4</sub> in N<sub>2</sub>.
